# Supplementary material for: The dimeric Golgi protein Gorab binds to Sas6 as a monomer to mediate centriole duplication
Source: eLife journal article supplement (doi:10.7554/elife.57241), 2021-03-11
Supplement: supp [file elife-57241-supp-v1.zip]

Archive with 26 entries (26 files):
- elife_poa_e57241_Figure_1_figure_supplement_1.pdf
- elife_poa_e57241_Figure_1_figure_supplement_2.pdf
- elife_poa_e57241_Figure_1_figure_supplement_3.pdf
- elife_poa_e57241_Figure_2_figure_supplement_1.pdf
- elife_poa_e57241_Figure_2_figure_supplement_2.pdf
- elife_poa_e57241_Figure_3_figure_supplement_1.pdf
- elife_poa_e57241_Figure_3_figure_supplement_2.pdf
- elife_poa_e57241_Figure_3_figure_supplement_3.pdf
- elife_poa_e57241_Figure_3_figure_supplement_4.pdf
- elife_poa_e57241_Figure_4_figure_supplement_1.pdf
- elife_poa_e57241_Figure_5_figure_supplement_1.pdf
- elife_poa_e57241_Figure_6_figure_supplement_1.pdf
- elife_poa_e57241_Figure_6_figure_supplement_2.pdf
- elife_poa_e57241_Figure_6_figure_supplement_3.pdf
- elife_poa_e57241_Video_1.mp4
- elife_poa_e57241_Video_2.mp4
- elife_poa_e57241_Transparent_Reporting_File.docx
- elife_poa_e57241_Figure_1_figure_supplement_3_source_data_1.xlsx
- elife_poa_e57241_Figure_2_source_data_1.pdf
- elife_poa_e57241_Figure_3_figure_supplement_2_source_data_1.pdf
- elife_poa_e57241_Figure_3_source_data_1.xlsx
- elife_poa_e57241_Figure_3_source_data_2.xlsx
- elife_poa_e57241_Figure_3_figure_supplement_3_source_data_1.xlsx
- elife_poa_e57241_Figure_4_source_data_1.xlsx
- elife_poa_e57241_Figure_4_figure_supplement_1_source_data_1.xlsx
- elife_poa_e57241_Figure_5_source_data_1.xlsx
