# Supplementary material for: The dimeric Golgi protein Gorab binds to Sas6 as a monomer to mediate centriole duplication
Source: eLife journal article supplement (doi:10.7554/elife.57241), 2021-03-11
Supplement: supp [file elife-57241-supp-v1.zip › elife_poa_e57241_Figure_1_figure_supplement_3_source_data_1.xlsx]

## Sheet: Sheet1
	Figure 1 figure supplement 3C Percentage of flies climbing 5 cm in 15 sec
	wild-type	gorab[1]	Ubq-Gorab Δ282-286; gorab[1]
Replica 1	100	30	80
Replica 2	95	25	100
Replica 3	95	25	80
