# Supplementary material for: The dimeric Golgi protein Gorab binds to Sas6 as a monomer to mediate centriole duplication
Source: eLife journal article supplement (doi:10.7554/elife.57241), 2021-03-11
Supplement: supp [file elife-57241-supp-v1.zip › elife_poa_e57241_Figure_3_figure_supplement_3_source_data_1.xlsx]

## Sheet: FCS
*Each (diffusion time) value is an average of 4-8 consecutive FCS measurements (values with SD > 8% were discarded)
	His-Sas6 F143D + MBP-Gorab CC (191-279aa)
		Diffusion time / μsec
	Sas6 / μM	1	2	3
	3.345		483.83
	1.675		486.82	486.78
	0.835	532.85	465.22	510.58
	0.63	527.78	520.03	478.08
	0.47		489.62	486.05
	0.355		494.46	494.2
	0.265		474.38	485.42
	0.2	544.3	394.53	469.6
	0.15	497.33	307.24	419.04
	0.11	350.13	192.26	366.55
	0.085	296.76	174.12
	0.065	283.08	174.48	244.06
	0.045		166.12
	0.035	180.5	136.91	228.53
	0.025	157.1	132.44	172.48
	0.015			150.9
	0.011	131.72		134.75
	0.0085	139.68
	0.0065	131.55
	0.0045	131.48
	0.0025	129.8	134.78	133.57
