# Supplementary material for: The dimeric Golgi protein Gorab binds to Sas6 as a monomer to mediate centriole duplication
Source: eLife journal article supplement (doi:10.7554/elife.57241), 2021-03-11

Figure 3 – figure supplement 4

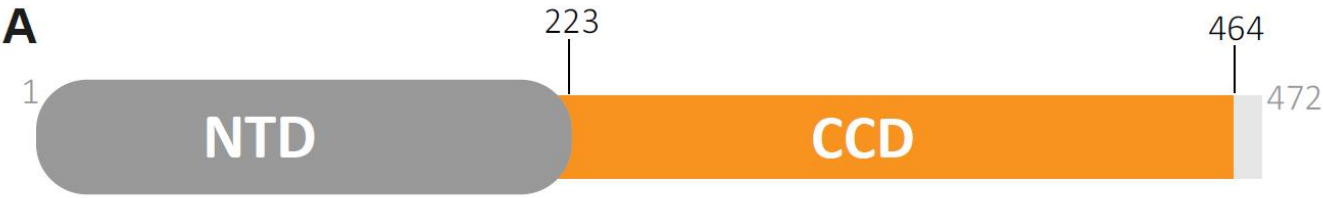

**B** **DmSas6-CCD**

223AAEVHQYQEKLKINEQRSNELERNRAI  
SGFQAQLDKASLEKAEKSAQEQAERKRCQTL  
SEELSCCKARVCTLKEQNDKLHGDVANIRKH  
ERKLEYKIEDLKQHTVELQEHIQKGNKEKAN  
IAAELEAEKKILHTRQALEMASEEISKANQ  
IIVKQSQELLNLKKTIAWRTEVALQQEKAVQ  
AKESLLSLRENELREARITIEKLREEIPQQL  
QSMRNFAQGLEQKYSKQILILKERLAI 464

M440 L447

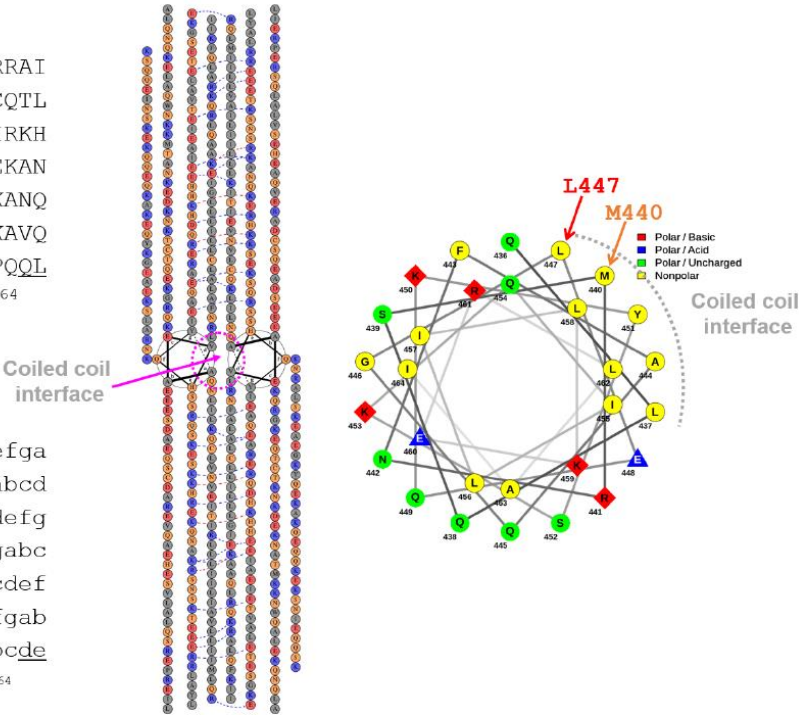

**Heptad repeat**

223abcdefgabcdefgabcdefgabcdefga  
bcdefgabcdefgabcdefgabcdefgabcd  
efgabcdefgabcdefgabcdefgabcdefg  
abcdefgabcdefgabcdefgabcdefgabc  
defgabcdefgabcdefgabcdefgabcdef  
gabcdefgabcdefgabcdefgabcdefgab  
cdefgabcdefgabcdefgabcdefgabcde  
fgabcdefgabcdefgabcdefgabcd 464

▲ ▲

**C** **DmSas6-CCD (aa223-464)**

AAEVHQYQEKLKINEQRSNELERNRAISGFQAQLDKASLEKAEKSAQEQAERKRCQTLSEELSCCKARVCTLKEQNDKLHG  
DVANIRKHHERKLEYKIEDLKQHTVELQEHIQKGNKEKANIAAELEAEKKILHTRQALEMASEEISKANQIIVKQSQELLNLK  
KTIAWRTEVALQQEKAVQAKESLLSLRENELREARITIEKLREEIPQQLQSMRNFAQGLEQKYSKQILILKERLAI

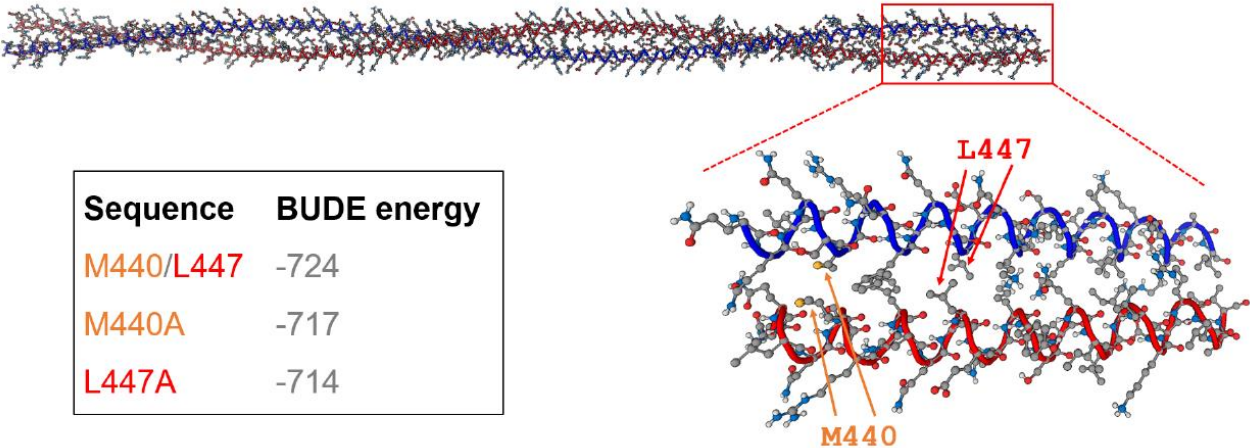

Supplement: supp [file elife-57241-supp-v1.zip › elife_poa_e57241_Figure_3_figure_supplement_4.pdf]
