# Supplementary material for: The dimeric Golgi protein Gorab binds to Sas6 as a monomer to mediate centriole duplication
Source: eLife journal article supplement (doi:10.7554/elife.57241), 2021-03-11
Supplement: supp [file elife-57241-supp-v1.zip › elife_poa_e57241_Figure_3_source_data_1.xlsx]

## Sheet: FCS
*Each (diffusion time) value is an average of 4-8 consecutive FCS measurements (values with SD > 8% were discarded)
MBP-Sas6 WT + MBP-Gorab CC (191-279aa)					MBP-Sas6 L447A + MBP-Gorab CC (191-279aa)
	Diffusion time / μsec					Diffusion time / μsec
Sas6 / μM	1	2	3		Sas6 / μM	1	2	3
1.67		526.15			3.9615			464.9
0.9405	539.03				2.971			445.64
0.835		521.28	513.67		2.2285	422.7		436.46
0.625		509.62	512.6		1.9125	415.34		467.7
0.47	533.28	504.83	511.05		1.8		426.17
0.3525	547.5	508.85	503.86		1.71	429.45	424.62
0.2645	494.98	498.56	489.83		1.672		415.88	415.62
0.1985	441.16	499.4	501.42		1.6315		378.87
0.1485	436.38	499.48	491.92		1.4345	354.3	395.32	429.62
0.1115		430.5	461.4		1.251	357.02	400.58	417.87
0.0835	350.25		335.95		1.044	329.817	342.43	377.3
0.0625	267.25		294.08		0.8355	249.8	266.84	307.86
0.047		232.48	279.08		0.6265	224.9	211.16	266.72
0.0355	222.85	269.28	242.08		0.47	161.04	202.63	203.15
0.0265			211.16		0.3525	158.625	169.38
0.02	153.6	186.1	196.64		0.2645	141.55	146.93	184.53
0.015	144.96	146.1	178.66		0.1985	123.05	144.82	166.68
0.011	141.73		139.08		0.1485	137.02	144.6	167.35
0.0085			147.9		0.1115	133.58	143.75	142.16
0.0065	137.24		141		0.0835	132.83		139.7
0.0045			133.04		0.0605			133.03
0.0035			134.64		0.05	136.625	136.7	137.48
0.0025	135.8	132.5	123.88
