# Supplementary material for: The dimeric Golgi protein Gorab binds to Sas6 as a monomer to mediate centriole duplication
Source: eLife journal article supplement (doi:10.7554/elife.57241), 2021-03-11
Supplement: supp [file elife-57241-supp-v1.zip › elife_poa_e57241_Figure_3_source_data_2.xlsx]

## Sheet: Fig3E
	Figure3E Percentage of eclosure
	wild-type	sas6[0]	gorab[1]	gorab[2]	Sas6-wt;sas6[0]	Sas6-M440A; sas6[0]	Sas6-L447A; sas6[0]
Replica 1	100	55	100	97.5	97.5	100	100
Replica 2	100	52.5	95	95	100	100	92.5
Replica 3	97.5	50	100	97.5	100	100	97.5
Replica 4	100	57.5	92.5	100	95	95	100
Replica 5	100	52.5	100	100	97.5	100	95

## Sheet: Fig3F
	Fig3F Percentage of flies climbing 5 cm in 15 sec
	wild-type	sas6[0]	gorab[1]	gorab[2]	Sas6-wt;sas6[0]	Sas6-M440A; sas6[0]	Sas6-L447A; sas6[0]
Replica 1	100	0	10	0	100	100	25
Replica 2	100	0	25	0	100	100	25
Replica 3	95	0	45	0	80	97.5	20
