# Supplementary material for: The dimeric Golgi protein Gorab binds to Sas6 as a monomer to mediate centriole duplication
Source: eLife journal article supplement (doi:10.7554/elife.57241), 2021-03-11
Supplement: supp [file elife-57241-supp-v1.zip › elife_poa_e57241_Figure_4_figure_supplement_1_source_data_1.xlsx]

## Sheet: Sheet1
	Figure 4 figure supplement 1B - number of centrioles in 50x50 um area
	wild-type	Sas6-wt; sas6[0]	Sas6-M440A; sas6[0]	gorab[1]	Sas6-L447A; sas6[0]	gorab[1]/gorab[2]	gorab[2]	sas6[0]
wing disc 1	538	627	600	190	22	52	4	2
wing disc 2	497	567	521	175	37	18	2	1
wing disc 3	523	477	622	142	61	38	3	0
wing disc 4	541	459	511	187	37	55	3	0
wing disc 5	487	641	637	201	49	21	5	1
