# Supplementary material for: The dimeric Golgi protein Gorab binds to Sas6 as a monomer to mediate centriole duplication
Source: eLife journal article supplement (doi:10.7554/elife.57241), 2021-03-11
Supplement: supp [file elife-57241-supp-v1.zip › elife_poa_e57241_Figure_4_source_data_1.xlsx]

## Sheet: Fig4B
		wild-type
category label #	category description	replica 1	replica 2	replica 3
1	two normal centriole	100	100	100
2	one normal centriole	0	0	0
3	one normal and one reduced centriole	0	0	0
4	two reduced centriole	0	0	0
5	one reduced centriole	0	0	0
6	no centriole	0	0	0
		Sas6-wt; sas6[0]
category label #	category description	replica 1	replica 2	replica 3
1	two normal centriole	100	100	100
2	one normal centriole	0	0	0
3	one normal and one reduced centriole	0	0	0
4	two reduced centriole	0	0	0
5	one reduced centriole	0	0	0
6	no centriole	0	0	0
		Sas6-M440A; sas6[0]
category label #	category description	replica 1	replica 2	replica 3
1	two normal centriole	100	100	100
2	one normal centriole	0	0	0
3	one normal and one reduced centriole	0	0	0
4	two reduced centriole	0	0	0
5	one reduced centriole	0	0	0
6	no centriole	0	0	0
		gorab[1]
category label #	category description	replica 1	replica 2	replica 3
1	two normal centriole	71	54	37
2	one normal centriole	6	12	12
3	one normal and one reduced centriole	4	7	11
4	two reduced centriole	7	11	9
5	one reduced centriole	18	13	22
6	no centriole	1	3	2
		Sas6-L447A; sas6[0]
category label #	category description	replica 1	replica 2	replica 3
1	two normal centriole	8	4	12
2	one normal centriole	5	6	2
3	one normal and one reduced centriole	18	15	12
4	two reduced centriole	16	21	26
5	one reduced centriole	48	46	37
6	no centriole	5	8	11
		gorab[1]/gorab[2]
category label #	category description	replica 1	replica 2	replica 3
1	two normal centriole	2	5	3
2	one normal centriole	9	21	15
3	one normal and one reduced centriole	3	5	4
4	two reduced centriole	14	30	22
5	one reduced centriole	62	40	51
6	no centriole	7	3	5
		gorab[2]
category label #	category description	replica 1	replica 2	replica 3
1	two normal centriole	0	0	0
2	one normal centriole	2	1	3
3	one normal and one reduced centriole	2	1	1
4	two reduced centriole	7	9	5
5	one reduced centriole	72	81	63
6	no centriole	18	14	22
		sas6[0]
category label #	category description	replica 1	replica 2	replica 3
1	two normal centriole	0	0	0
2	one normal centriole	0	0	0
3	one normal and one reduced centriole	0	0	0
4	two reduced centriole	0	0	0
5	one reduced centriole	0	0	0
6	no centriole	100	100	100
