# Supplementary material for: The dimeric Golgi protein Gorab binds to Sas6 as a monomer to mediate centriole duplication
Source: eLife journal article supplement (doi:10.7554/elife.57241), 2021-03-11
Supplement: supp [file elife-57241-supp-v1.zip › elife_poa_e57241_Figure_5_source_data_1.xlsx]

## Sheet: Rotary shadowing
Sas6 FL / nm	Sas6 FL + MBP Gorab FL / nm	Sas6 FL + MBP Gorab CC long (191-338 aa) / nm	Sas6 FL + MBP Gorab CC short (191-279 aa) / nm
48.024	52.824	61.816	48.523
44.95	37.37	52.859	46.01
40.856	38.422	57.943	53.316
35.084	53.647	60.2	46.856
45.711	50.525	59.586	49.458
43.188	52.948	63.588	52.308
42.627	58.454	57.951	48.257
46.244	46.95	61.18	49.424
41.828	61.063	56.878	51.919
38.592	39.1	60.264	50.848
44.467	37.37	55.017	45.032
42.379	49.951	63.268	51.471
44.467	48.428	66.188	42.749
38.193	52.844	66.981	47.097
36.803	60.174	67.534	56.313
35.96	53.36	48.28	47.193
31.796	50.318	45.791	52.504
44.703	55.465	49.473	43.662
40.194	51.489	43.444	52.26
48.247	42.296	50.316	45.342
38.547	52.197	46.054	54.382
42.441	47.597	47.886	52.12
36.42	61.977	47.511	55.995
41.953	51.926	44.074	52.141
40.324	51.096	47.864	49.109
39.766	57.096	47.618	52.78
43.872	52.824	46.944	51.276
34.783	44.516	49.358	52.831
37.673	61.076	48.389	49.907
40.063	51.081	53.463	49.91
32.773	69.238	45.359	44.986
37.905	51.423	48.584	53.659
43.188	58.873	52.005	50.304
39.412	68.01	51.41	48.255
41.744	64.239	48.338	47.541
42.327	64.71	46.481	46.556
44.467	44.156	48.494	47.472
40.259	68.484	50.642	52.974
37.778	50.53	42.453	48.879
36.779	67.896	44.832	45.677
41.28	66.949	47.884	51.243
39.711	50.856	49.109	49.64
34.442	64.136	49.605	54.992
41.859	59.244	40.533	46.156
39.323	54.077	48.719	43.273
41.056	53.583	49.134	48.342
43.218	52.828	48.745	46.227
40.498	62.532	53.82	55.69
40.194	64.628	48.284	51.81
39.986	52.667	45.435	50.537
41.12	52.573	50.548	51.241
39.49	52.22	46.933	54.795
41.576	61.382	52.82	52.057
46.734	52.875	49.782	53.528
47.368	70.221	44.216	47.859
37.264	67.551	50.682	54.582
39.29	51.15	55.935	43.521
44.742	56.435	54.141	45.789
43.025	62.173	47.742	49.596
39.189	53.284	49.716	54.229
42.068	52.382	47.878	48.94
44.497	63.472	48.436	48.211
44.151	61.479	42.623	50.519
41.12	47.192	49.22	57.046
39.1	61.228	54.338	51.547
39.722	66.726	50.849	50.904
41.46	63.626	46.765	53.661
45.084	62.093	45.096	46.578
45.181	40.867	50.805	49.944
39.733	59.029	49.196	53.263
41.565	50.102	44.95	48.563
41.702	42.783	51.59	48.23
43.188	54.46	42.308	50.85
42.068	42.317	47.324	43.543
40.519	63.061	43.147	53.505
43.702	59.016	47.013	42.281
45.586	50.464	53.34	51.743
39.733	47.509	48.674	46.237
47.663	54.004	45.902	54.694
43.511	50.782	45.234	43.183
34.783	55.821	54.344	49.48
43.682	46.35	42.944	46.888
45.701	50.578	49.707	47.772
35.284	65.382	45.316	37.159
43.269	65.593	45.742	50.73
40.378	50.284	49.396	51.256
36.922	52.178	40.324	49.962
39.986		50.364	49.775
40.019		46.809	48.519
41.953		47.092	44.27
36.838		50.503	50.323
39.909		49.651	49.54
38.954		52.709	44.978
42.327		56.657	46.679
41.152		48.126	48.062
37.123		47.832	47.573
31.114		48.816	50.496
46.349		46.145	51.006
45.711		47.053	49.629
43.147		51.226	47.962
43.662		57.708	47.523
43.762		68.207	50.213
39.711		54.918	44.623
39.457		59.765	50.276
		62.651	48.444
		52.374	54.459
		59.247	52.063
		68.085	46.032
		60.844	53.124
		58.224	54.284
		65.942	48.712
		58.964	48.835
		55.55	46.315
		53.23	56.629
		52.102
		62.324
		59.045
		54.005
