# Supplementary figures and images for: The dimeric Golgi protein Gorab binds to Sas6 as a monomer to mediate centriole duplication
Source: eLife journal article supplement (doi:10.7554/elife.57241), 2021-03-11

**Figure 1 – figure supplement 1**

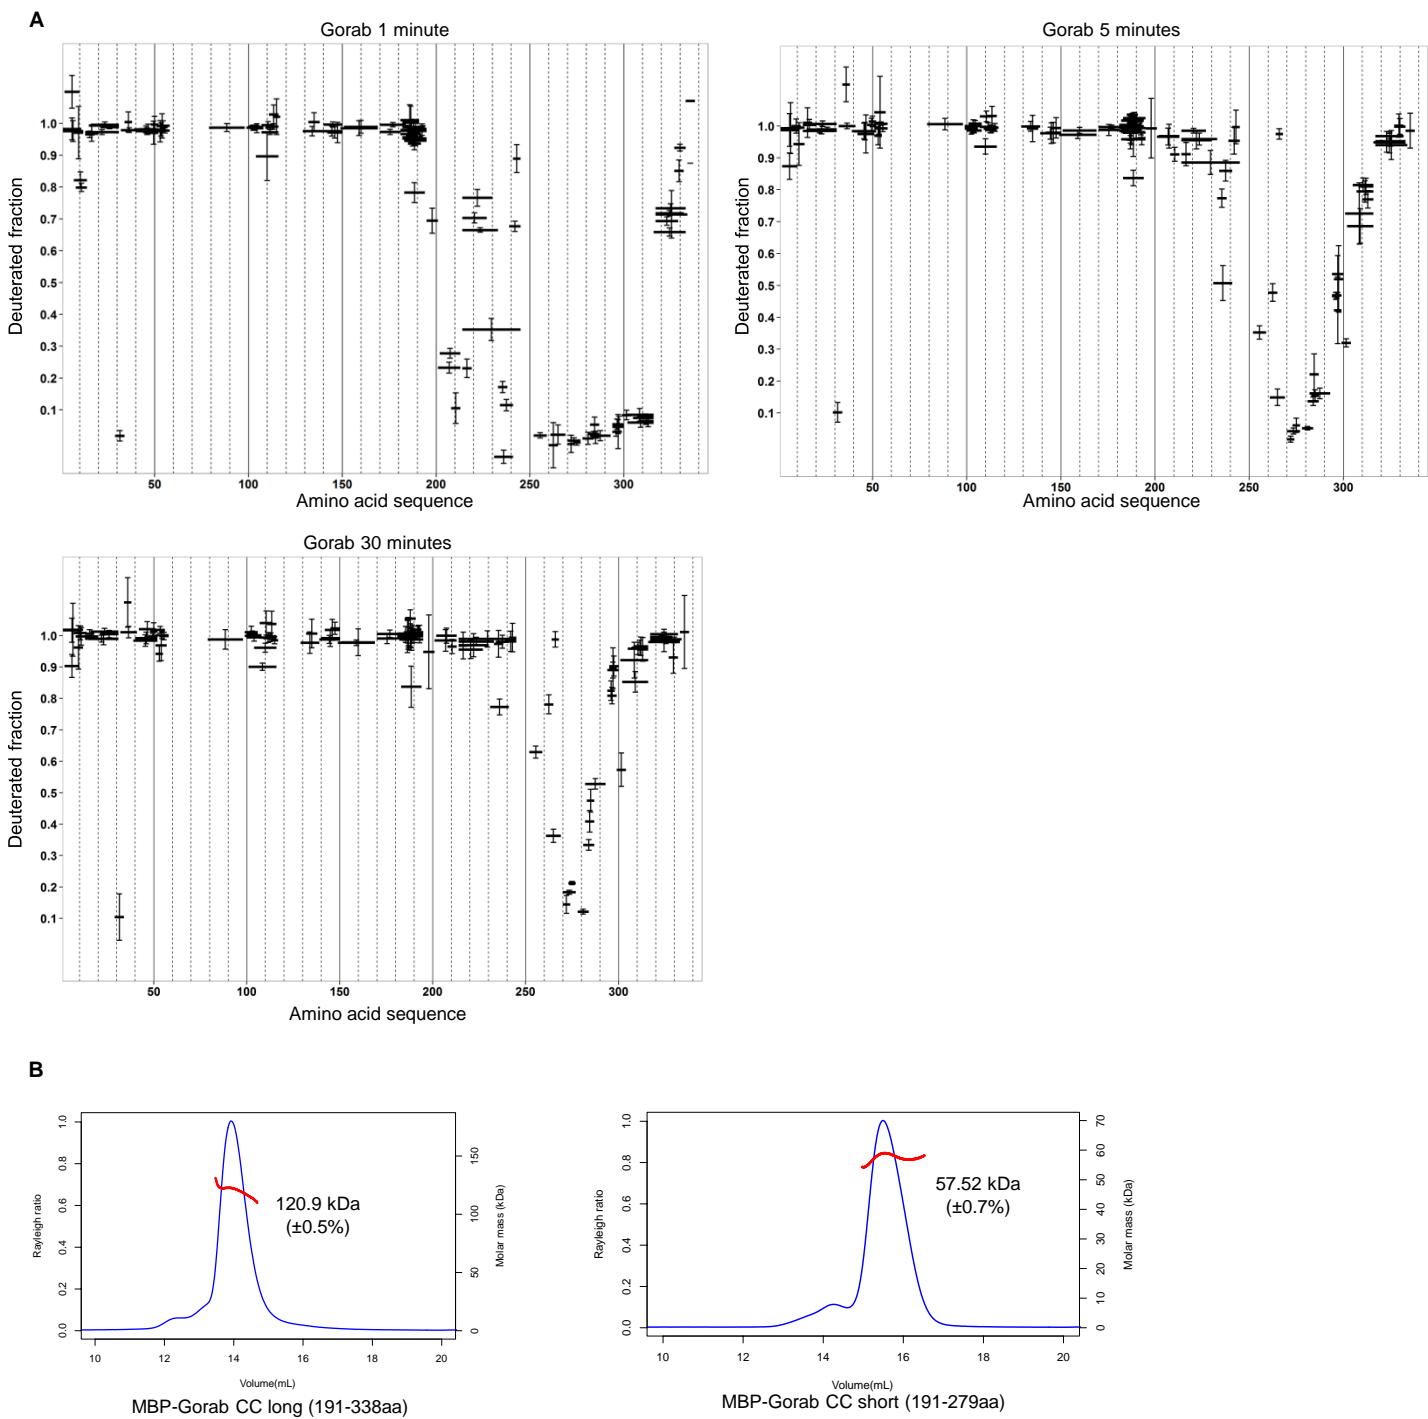

Supplement: supp [file elife-57241-supp-v1.zip › elife_poa_e57241_Figure_1_figure_supplement_1.pdf]

**Figure 1 – figure supplement 2**

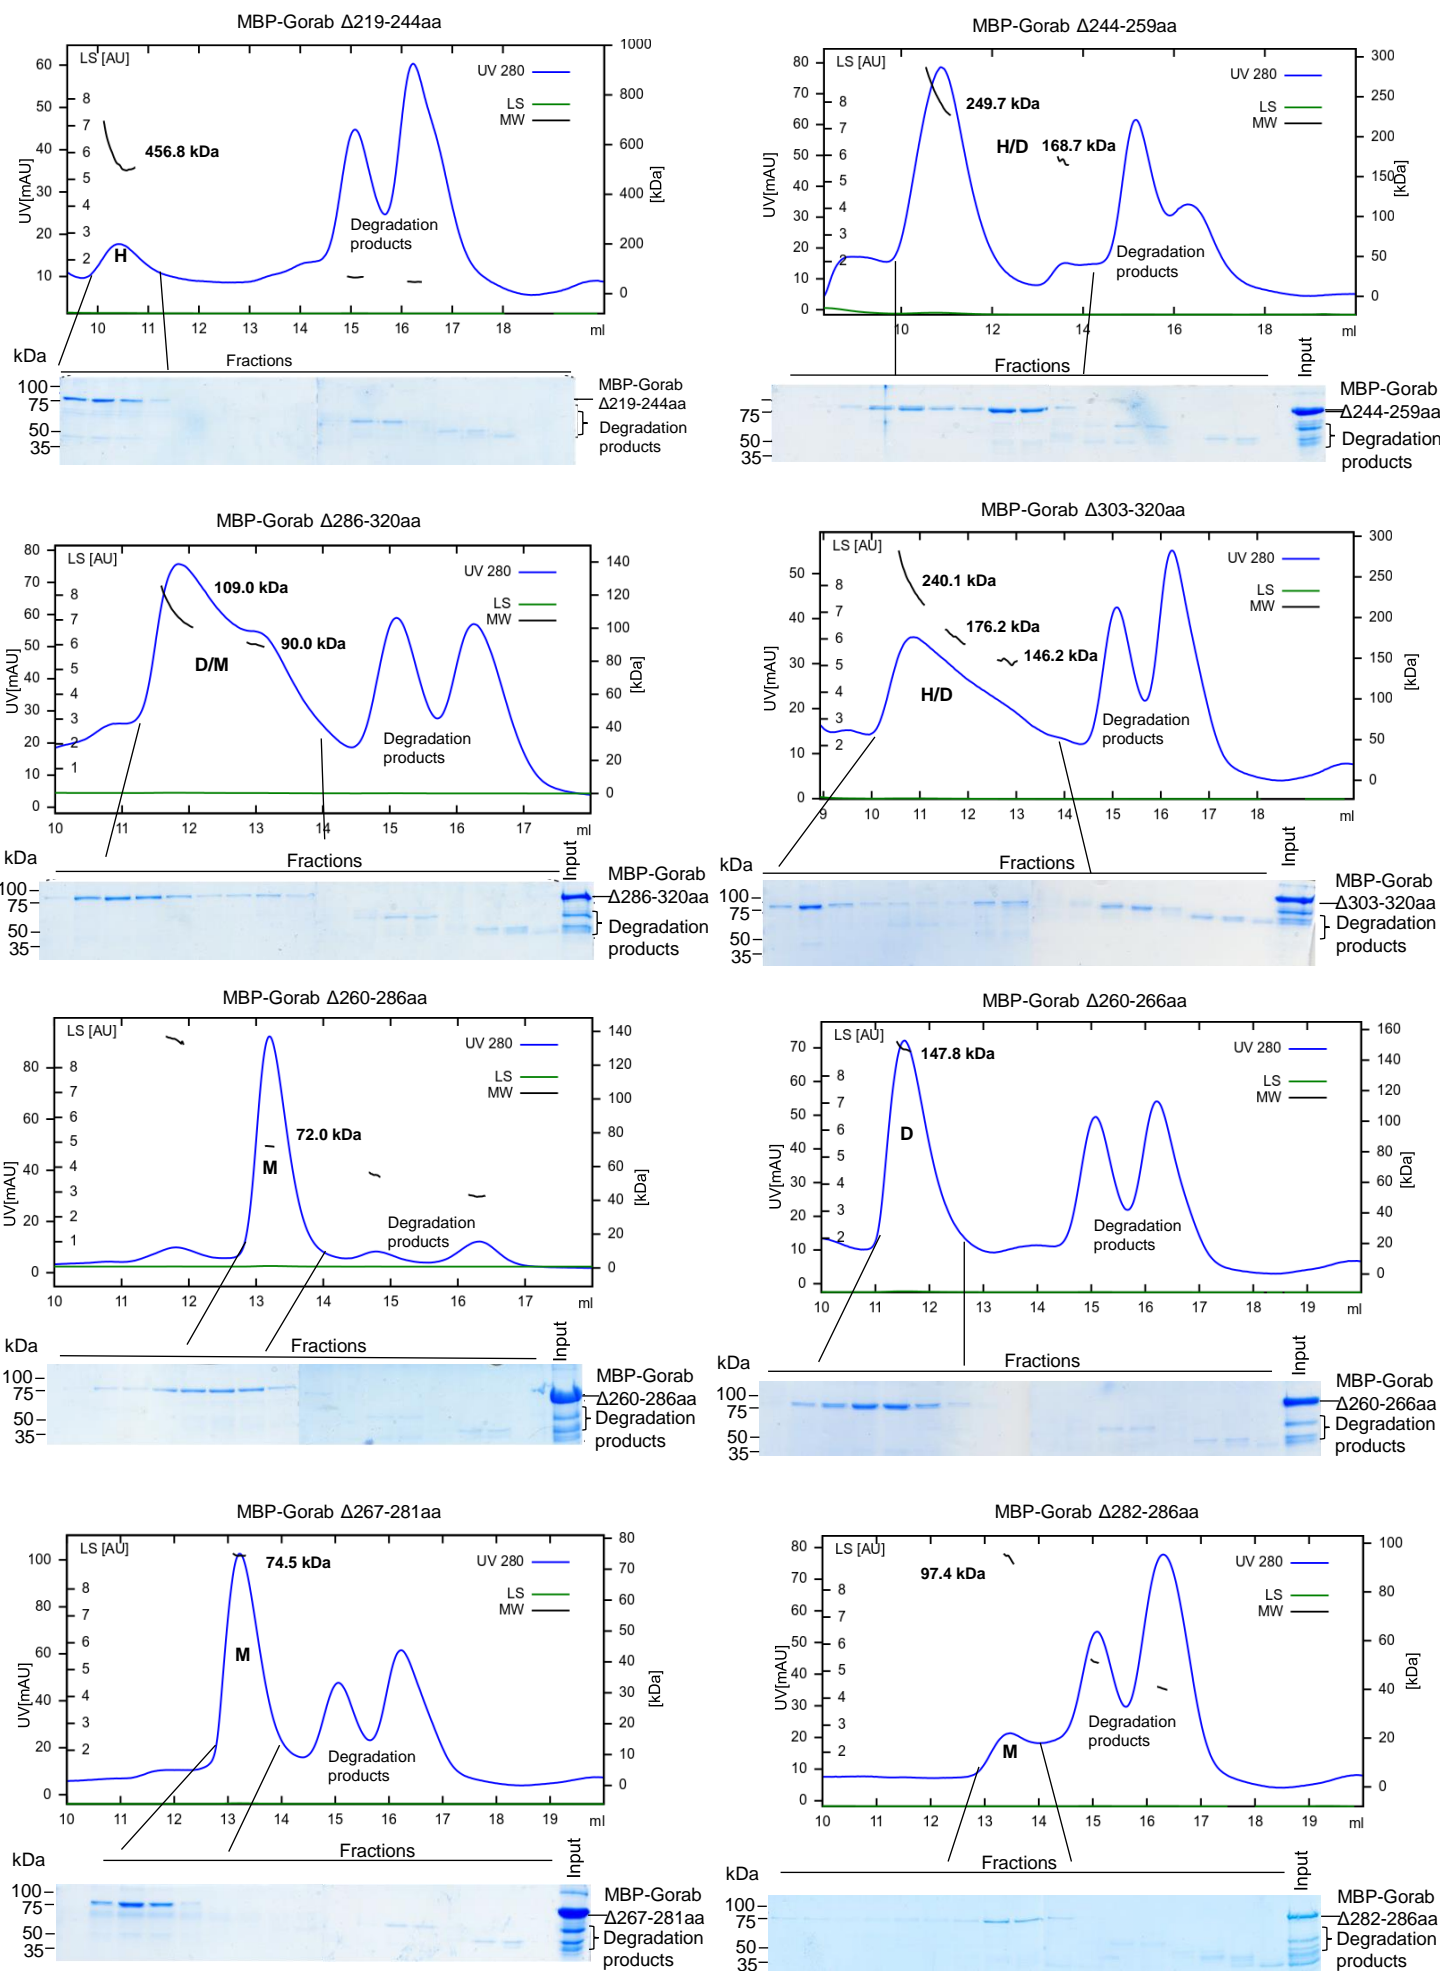

Supplement: supp [file elife-57241-supp-v1.zip › elife_poa_e57241_Figure_1_figure_supplement_2.pdf]

Figure 1 – figure supplement 3

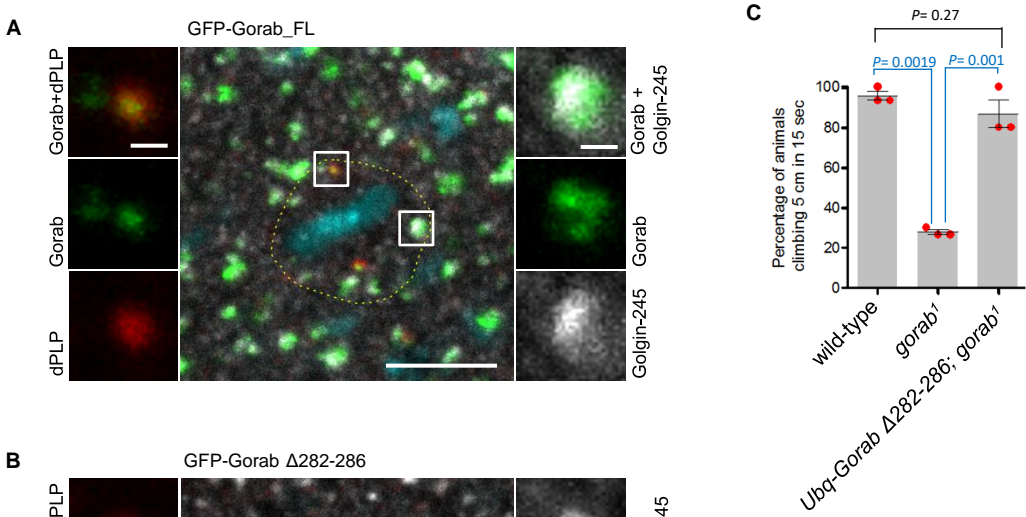

Supplement: supp [file elife-57241-supp-v1.zip › elife_poa_e57241_Figure_1_figure_supplement_3.pdf]

**Figure 2 – figure supplement 1**

**A**

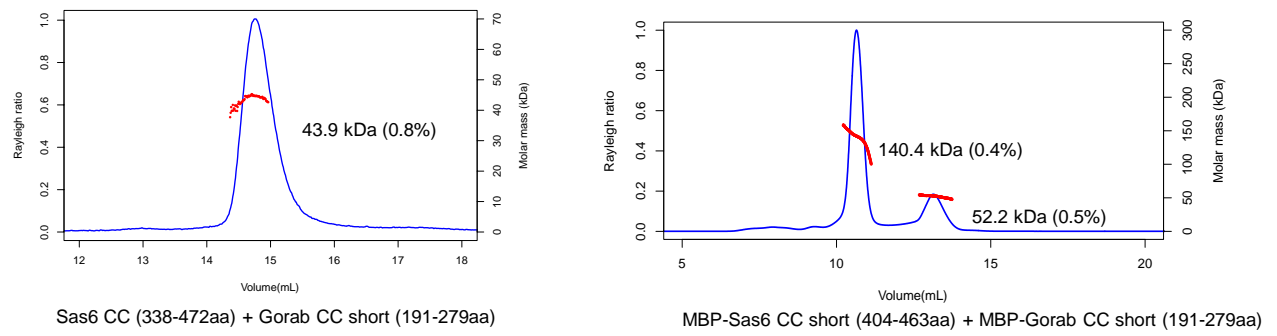

**B**

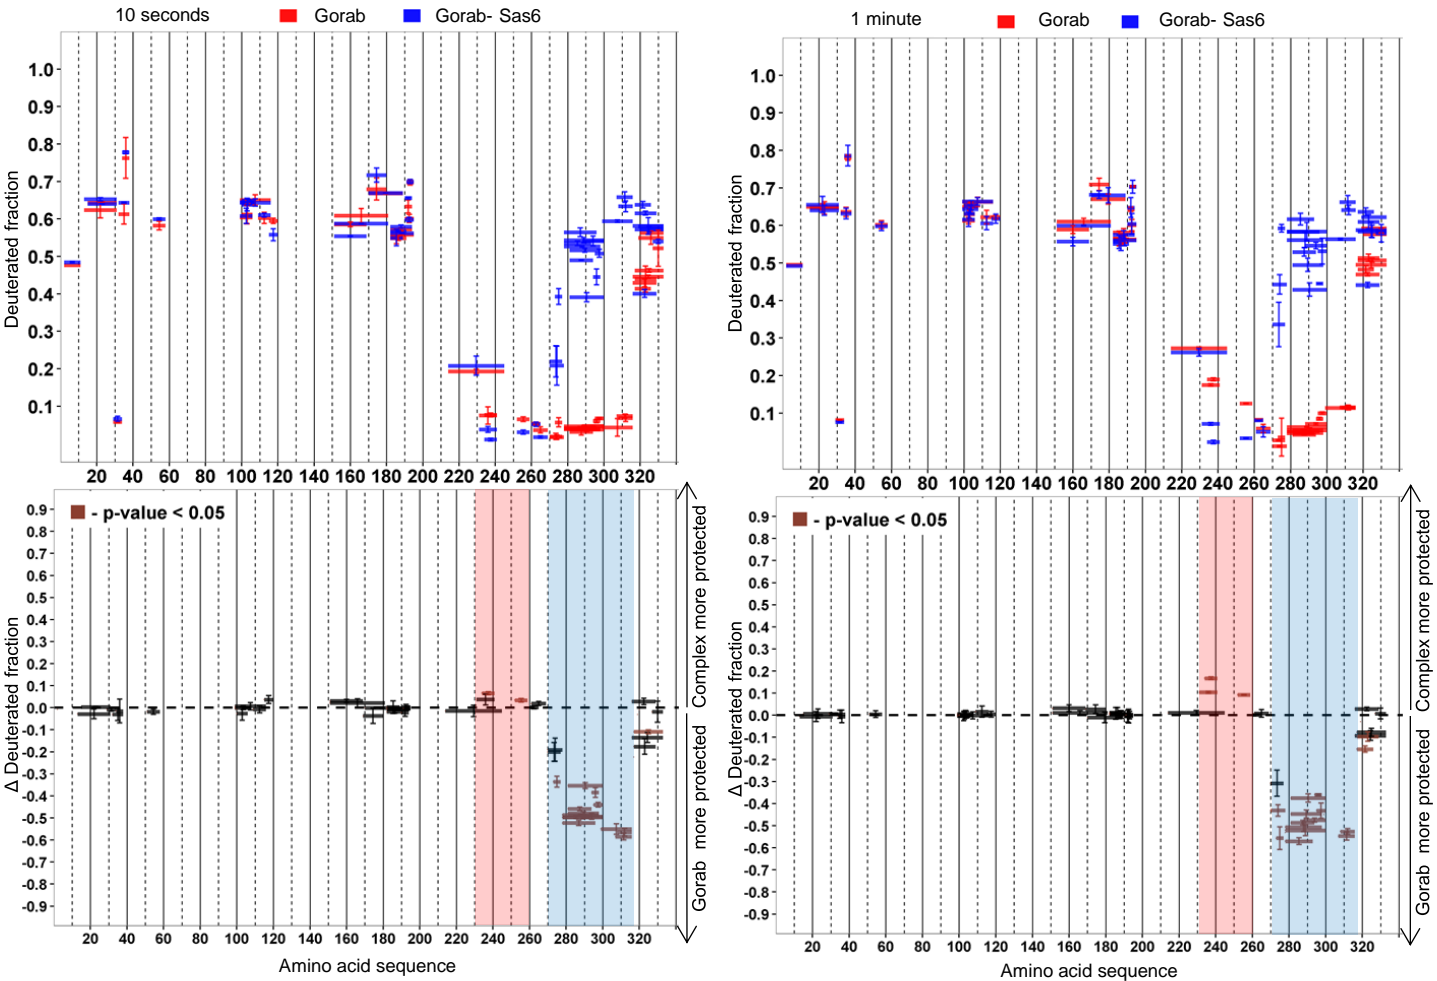

Supplement: supp [file elife-57241-supp-v1.zip › elife_poa_e57241_Figure_2_figure_supplement_1.pdf]

**Figure 2 – figure supplement 2**

**A**

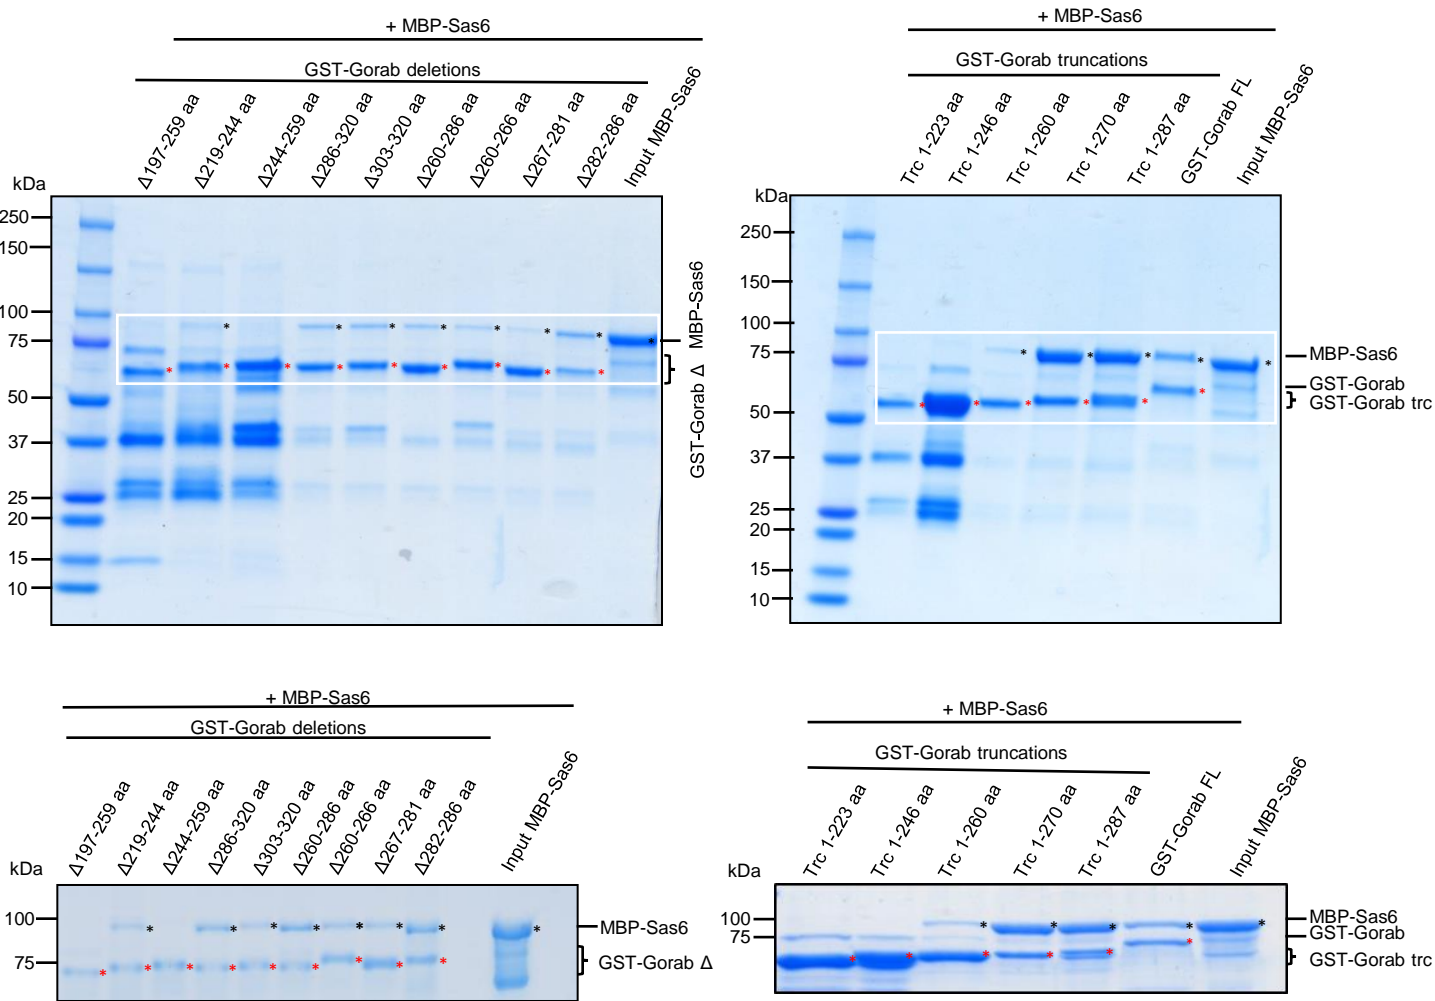

**B**

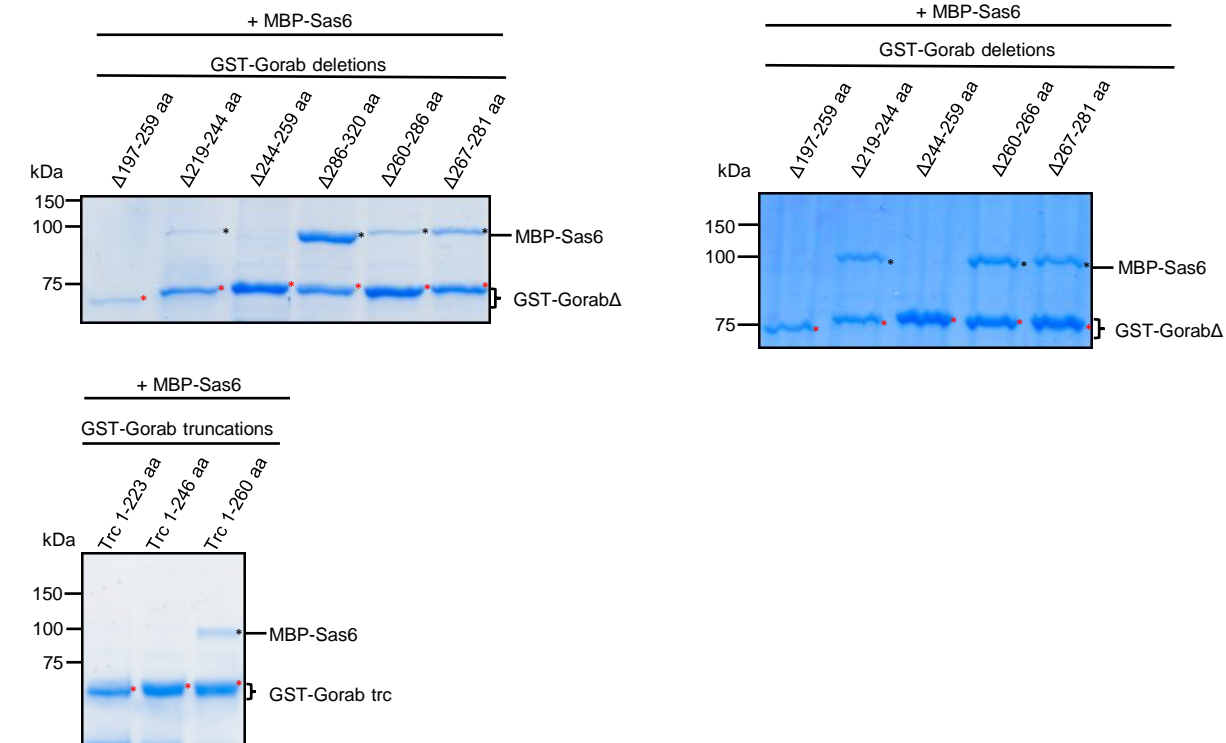

Supplement: supp [file elife-57241-supp-v1.zip › elife_poa_e57241_Figure_2_figure_supplement_2.pdf]

Figure 3 – figure supplement 1

A

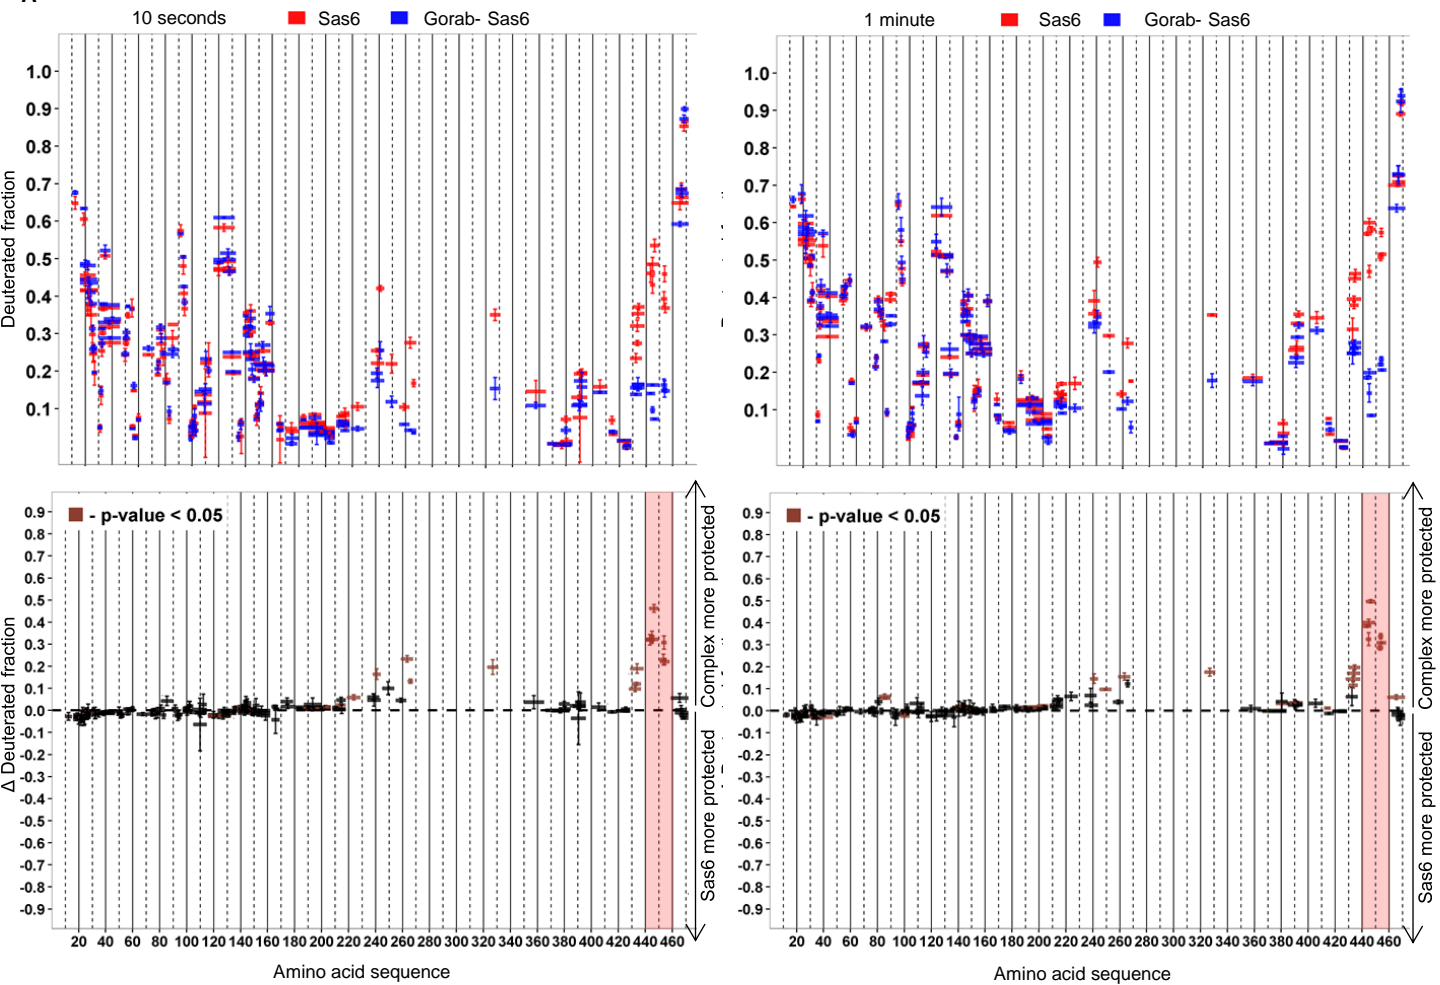

B

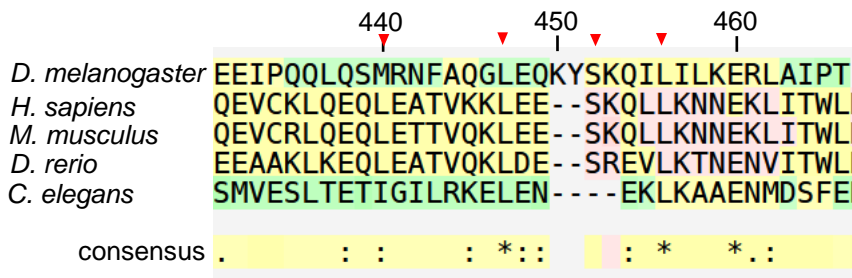

Supplement: supp [file elife-57241-supp-v1.zip › elife_poa_e57241_Figure_3_figure_supplement_1.pdf]

**Figure 3 – figure supplement 2**

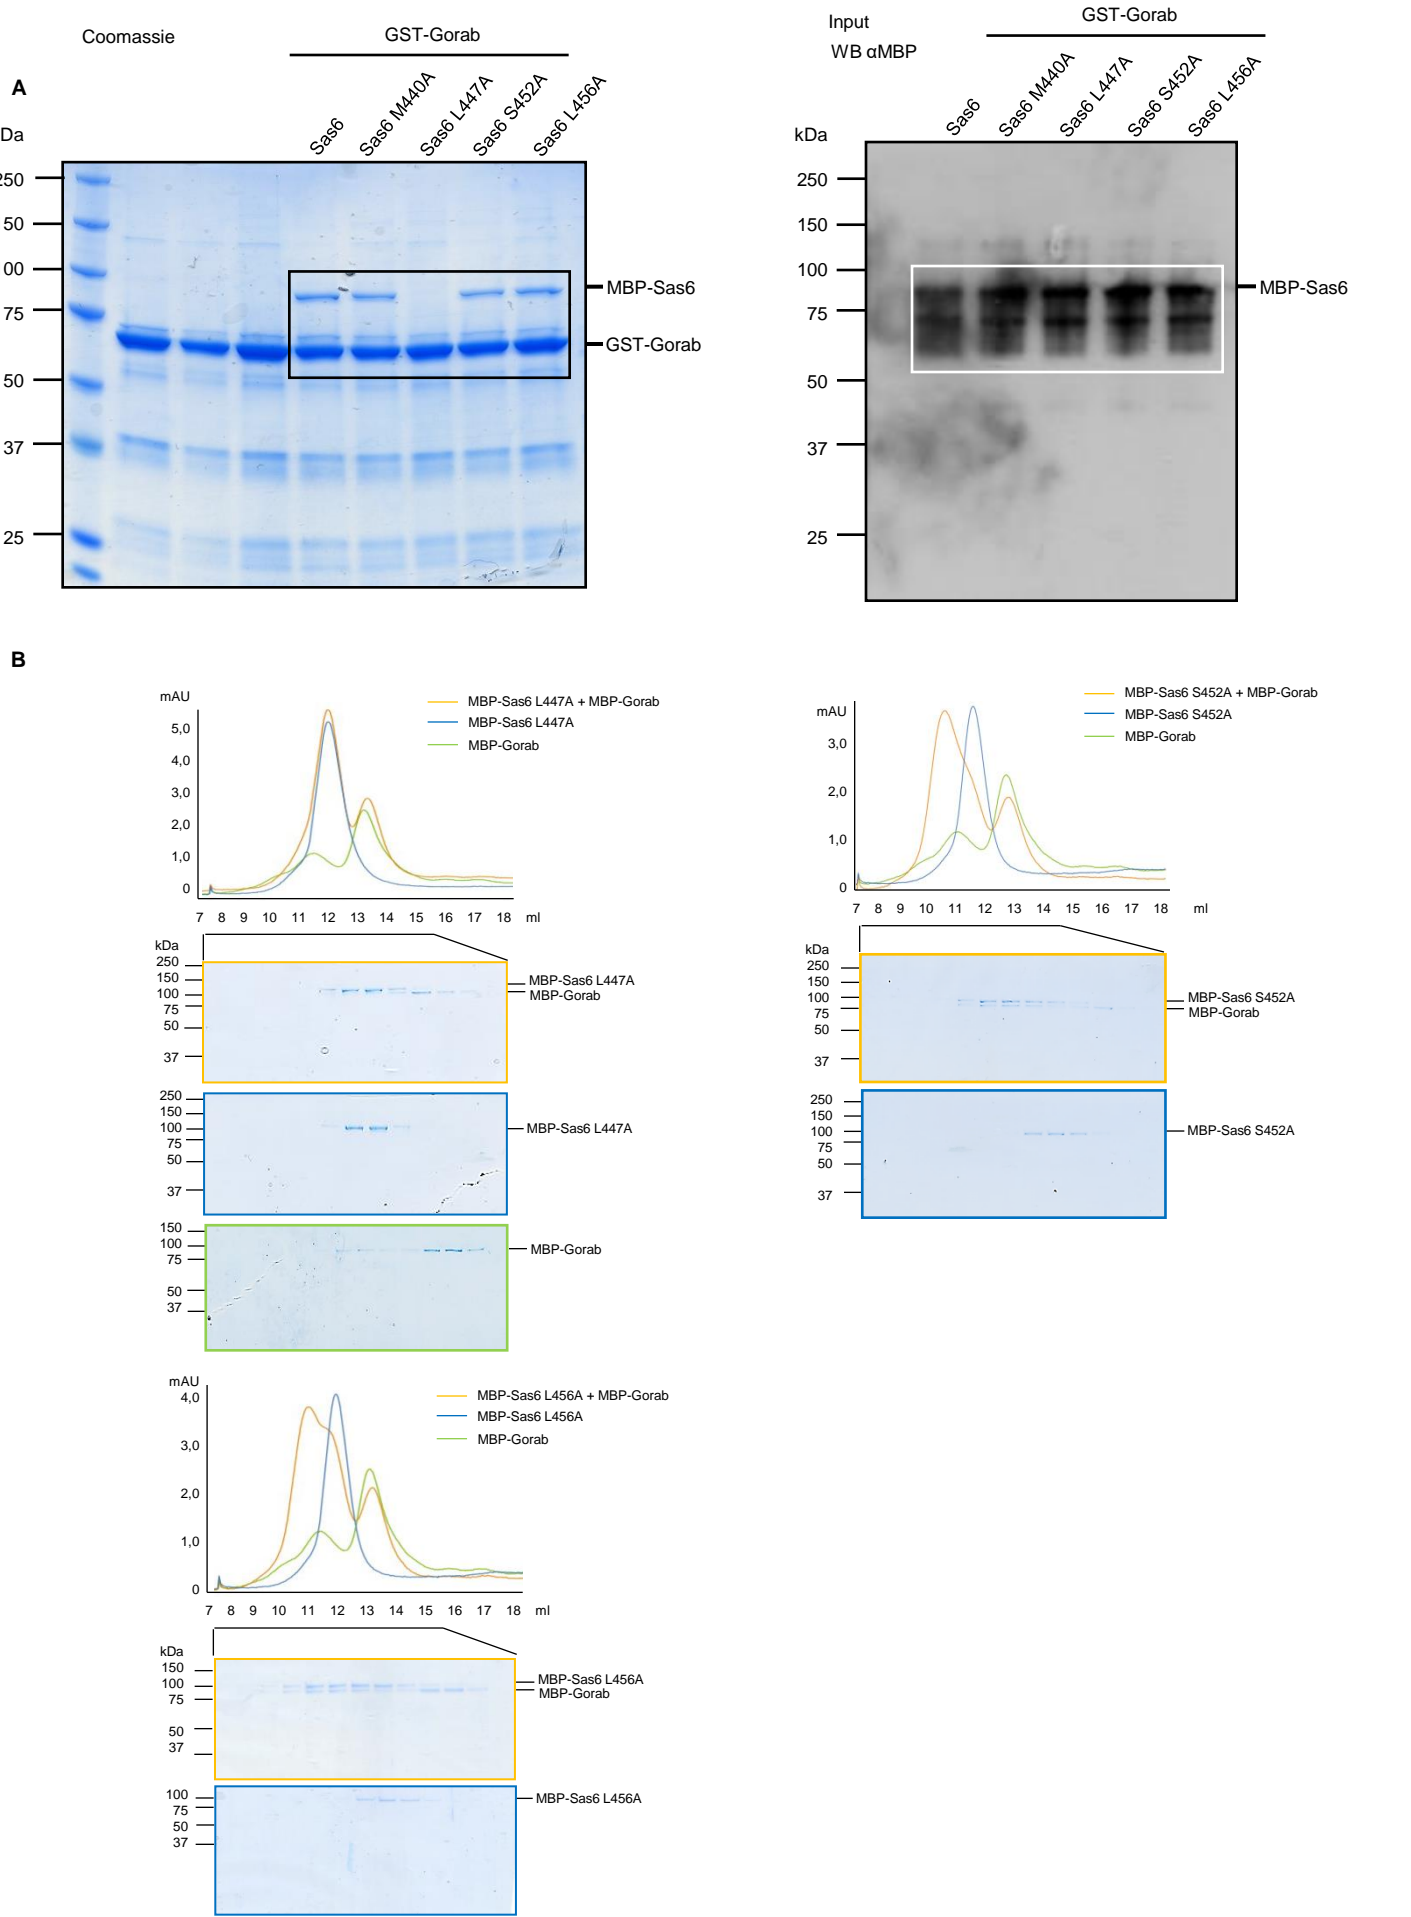

Supplement: supp [file elife-57241-supp-v1.zip › elife_poa_e57241_Figure_3_figure_supplement_2.pdf]

Figure 3 – figure supplement 3

A

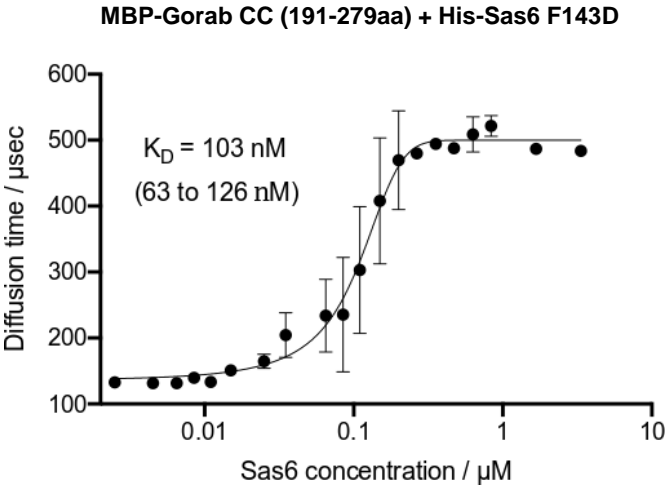

B

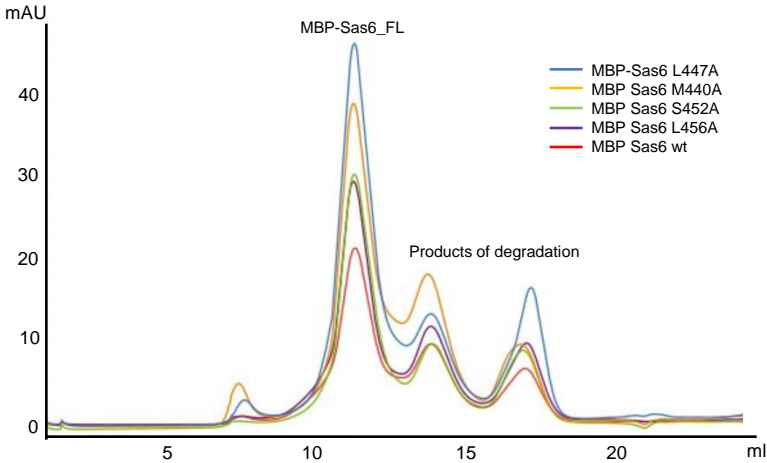

Supplement: supp [file elife-57241-supp-v1.zip › elife_poa_e57241_Figure_3_figure_supplement_3.pdf]

Figure 4 – figure supplement 1

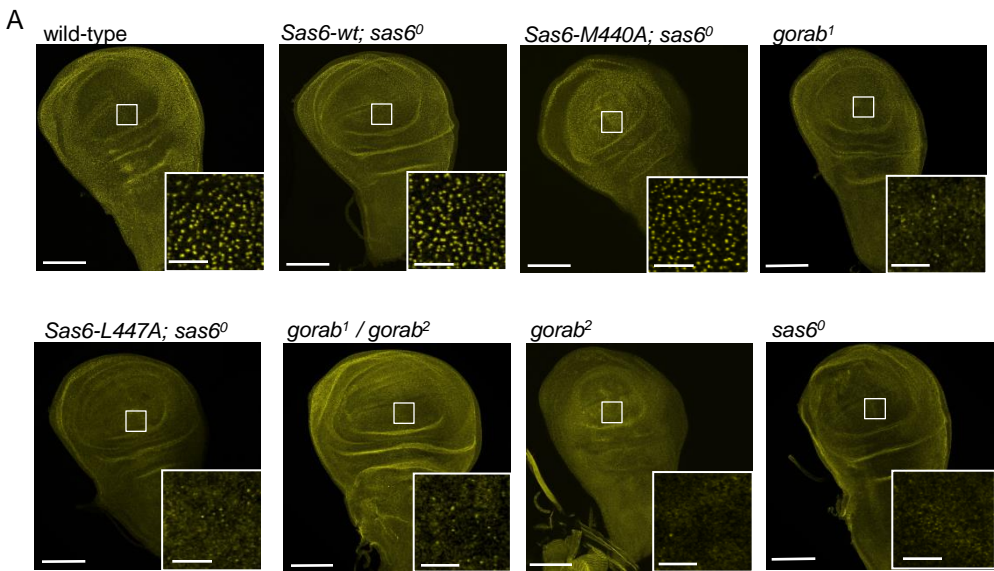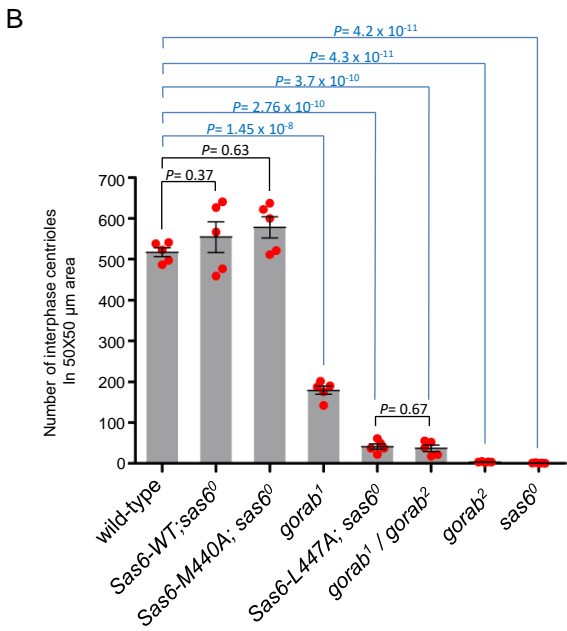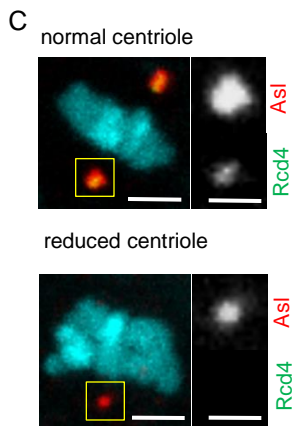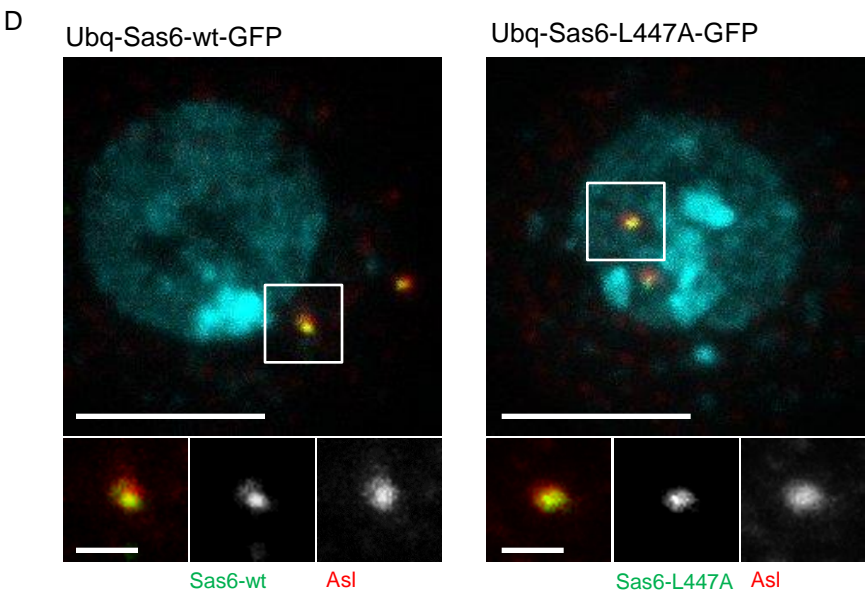

Supplement: supp [file elife-57241-supp-v1.zip › elife_poa_e57241_Figure_4_figure_supplement_1.pdf]

Figure 5 - figure supplement 1

A

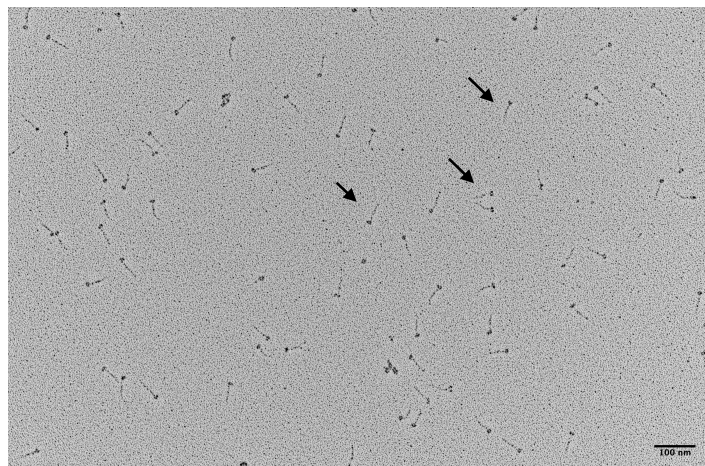

B

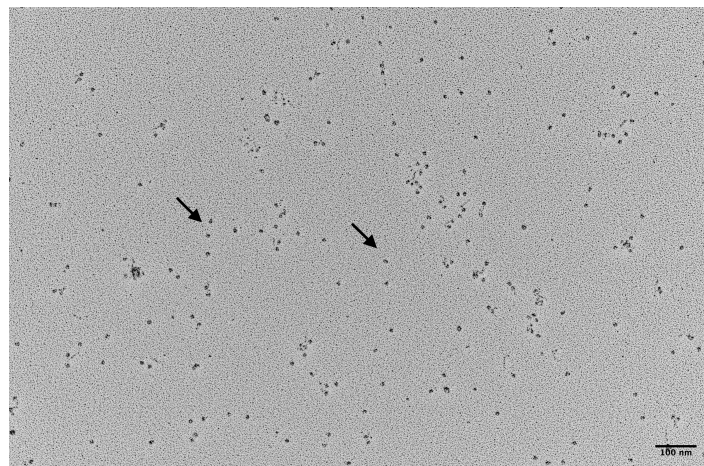

C

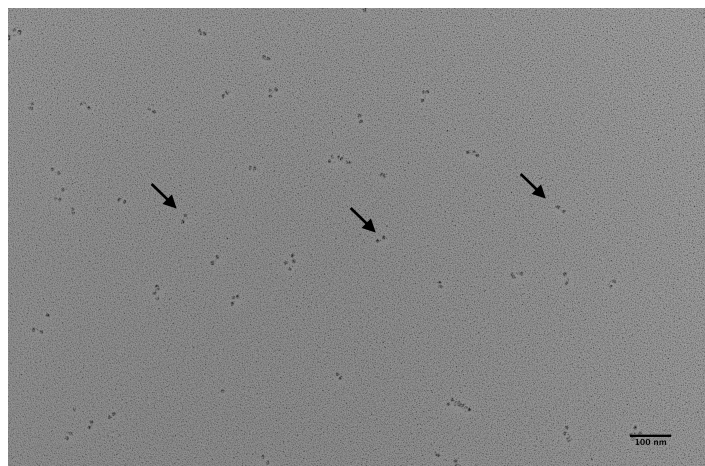

D

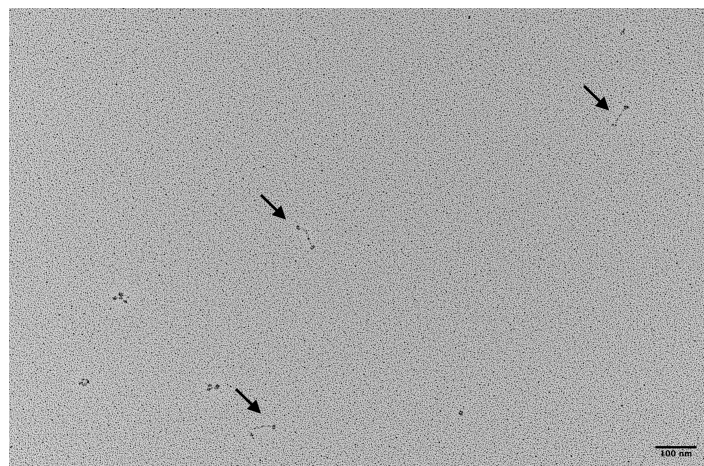

E

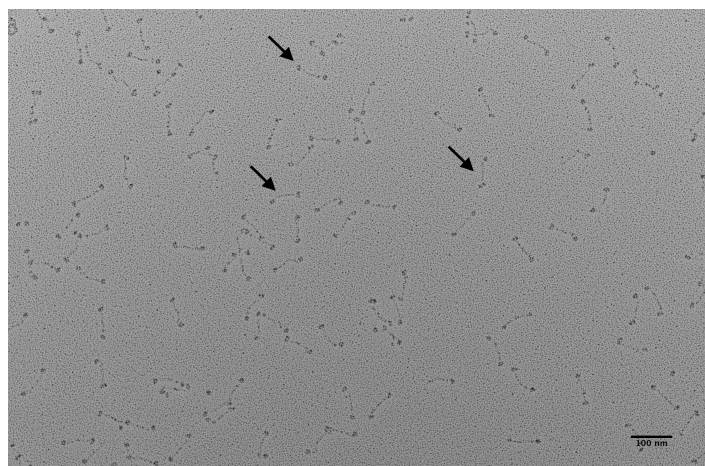

F

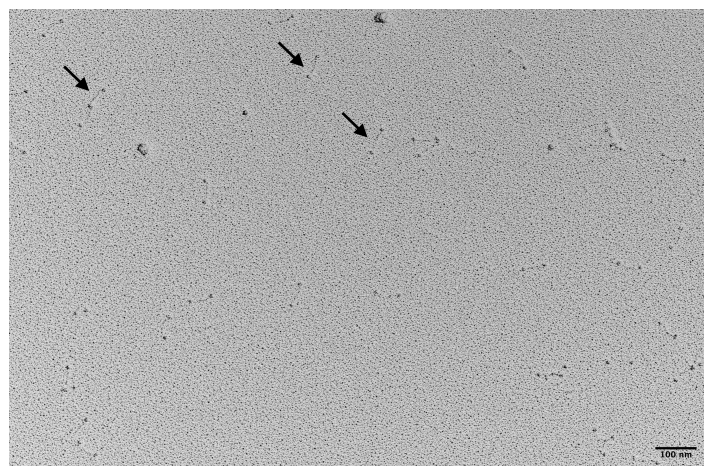

Supplement: supp [file elife-57241-supp-v1.zip › elife_poa_e57241_Figure_5_figure_supplement_1.pdf]

Figure 6 – figure supplement 1

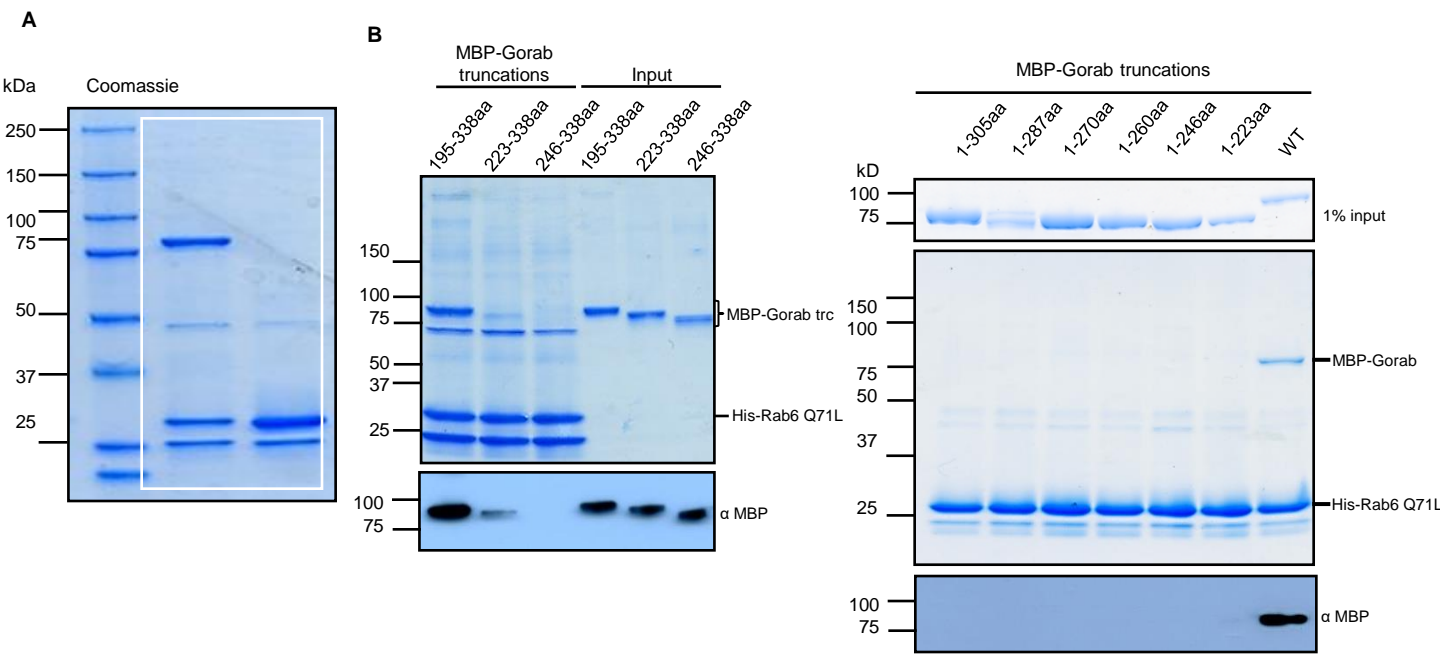

Supplement: supp [file elife-57241-supp-v1.zip › elife_poa_e57241_Figure_6_figure_supplement_1.pdf]

Figure 6 – figure supplement 2

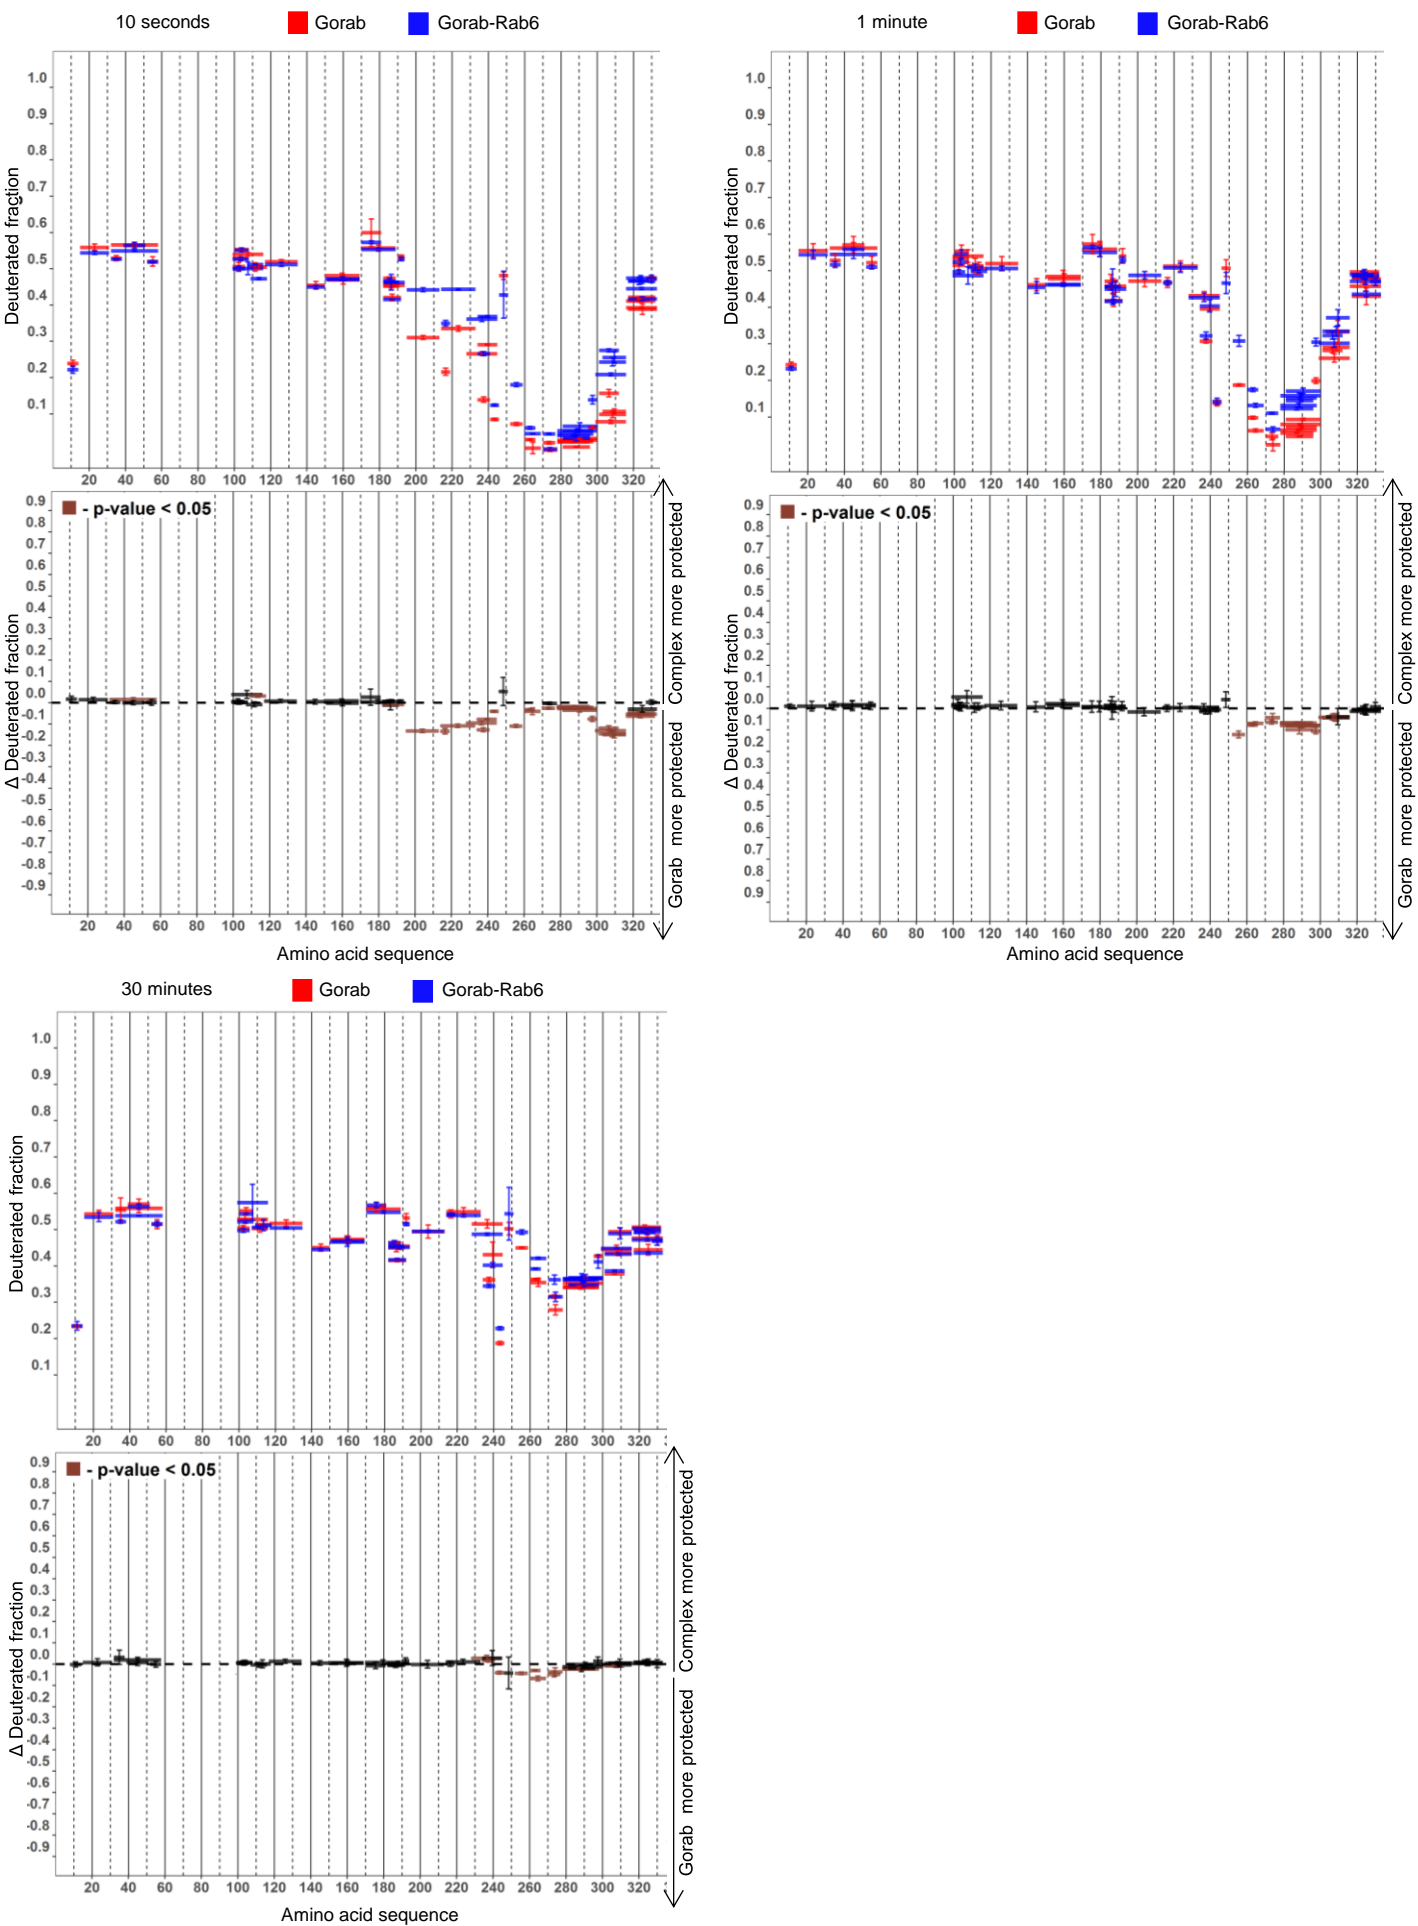

Supplement: supp [file elife-57241-supp-v1.zip › elife_poa_e57241_Figure_6_figure_supplement_2.pdf]

Figure 6 – figure supplement 3

A

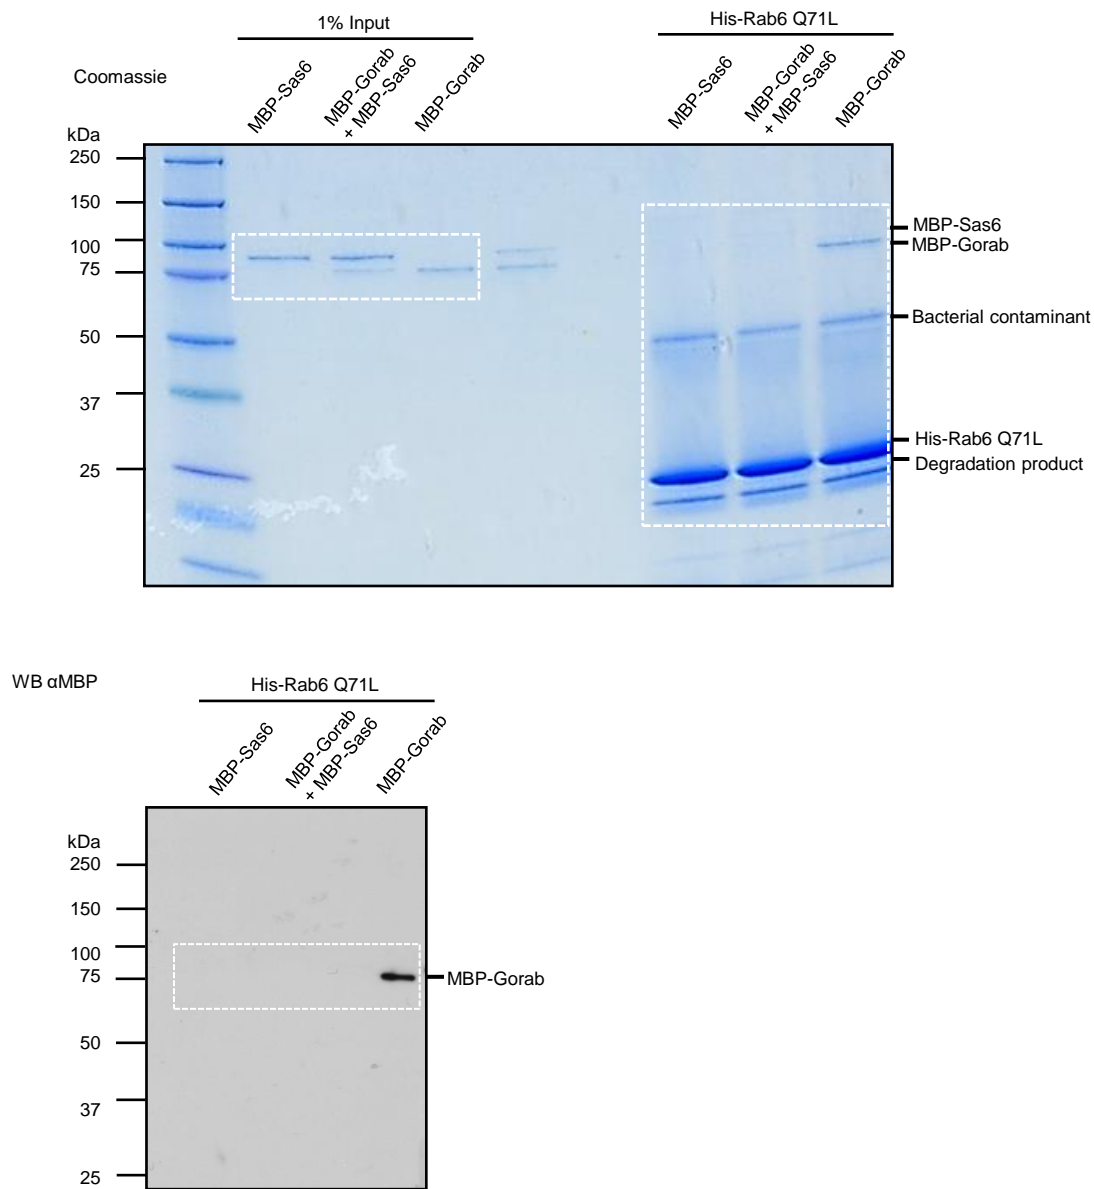

Supplement: supp [file elife-57241-supp-v1.zip › elife_poa_e57241_Figure_6_figure_supplement_3.pdf]

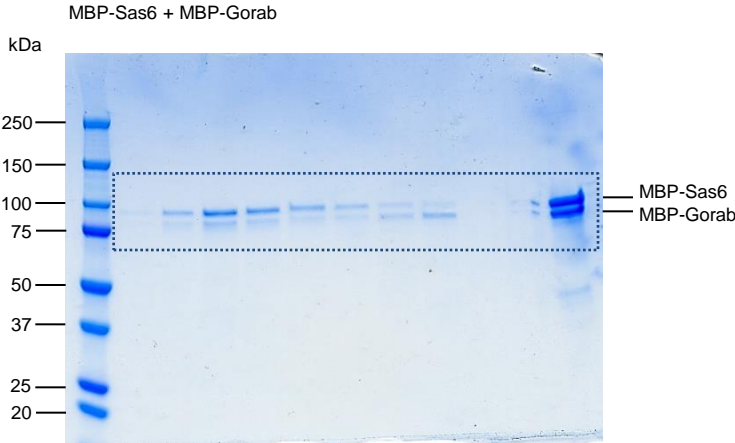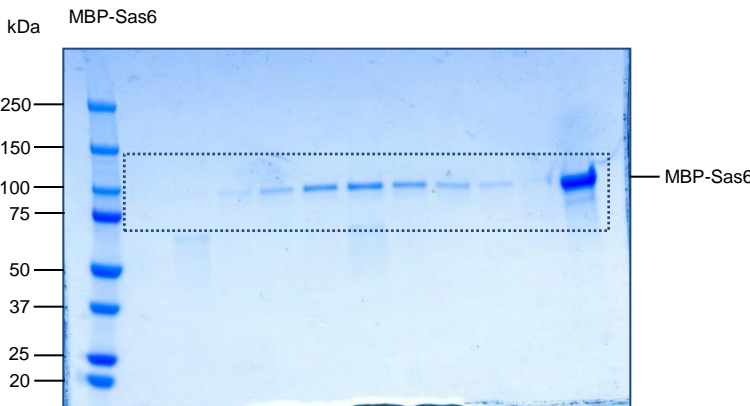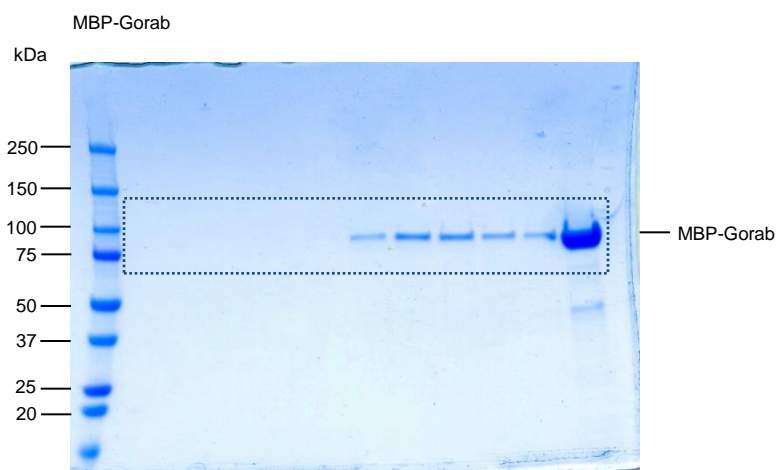

Supplement: supp [file elife-57241-supp-v1.zip › elife_poa_e57241_Figure_2_source_data_1.pdf]

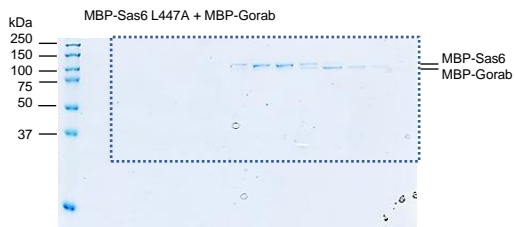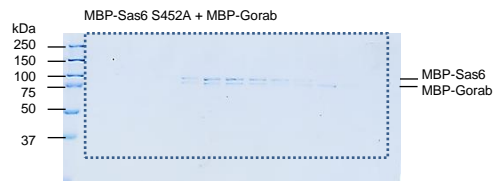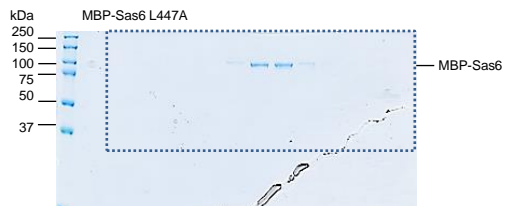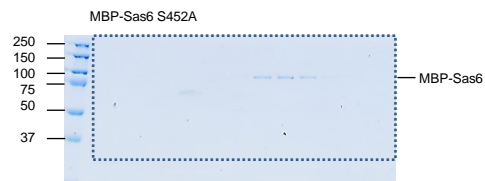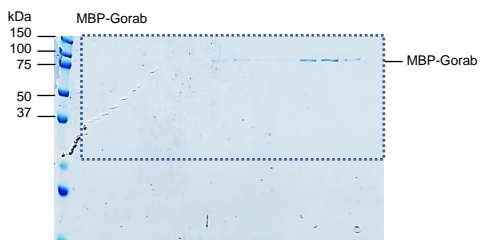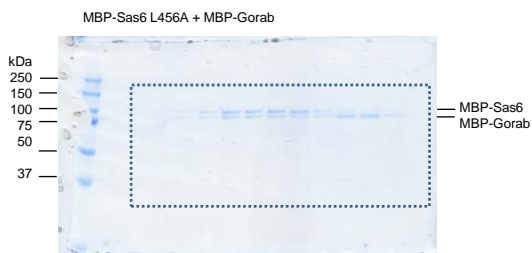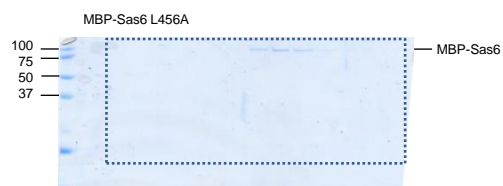

Supplement: supp [file elife-57241-supp-v1.zip › elife_poa_e57241_Figure_3_figure_supplement_2_source_data_1.pdf]
